# Supplementary material for: A Comprehensive Outlook on Dilated Cardiomyopathy (DCM): State-Of-The-Art Developments with Special Emphasis on OMICS-Based Approaches
Source: MDPI journal article supplement (doi:10.3390/jcdd9060174), 2022-06-01
Supplement: s1 [file s1]

Review

# A comprehensive outlook on Dilated Cardiomyopathy (DCM): State-of-the-art developments with special emphasis on OMICS based approaches

Vivek Sarohi<sup>1,2</sup>, Shriya Srivastava<sup>1</sup>, Trayambak Basak<sup>\*1,2</sup>

Supplementary Information:

Supplementary Figure S1: Representative map of India highlighting different studies performed on DCM across the country.

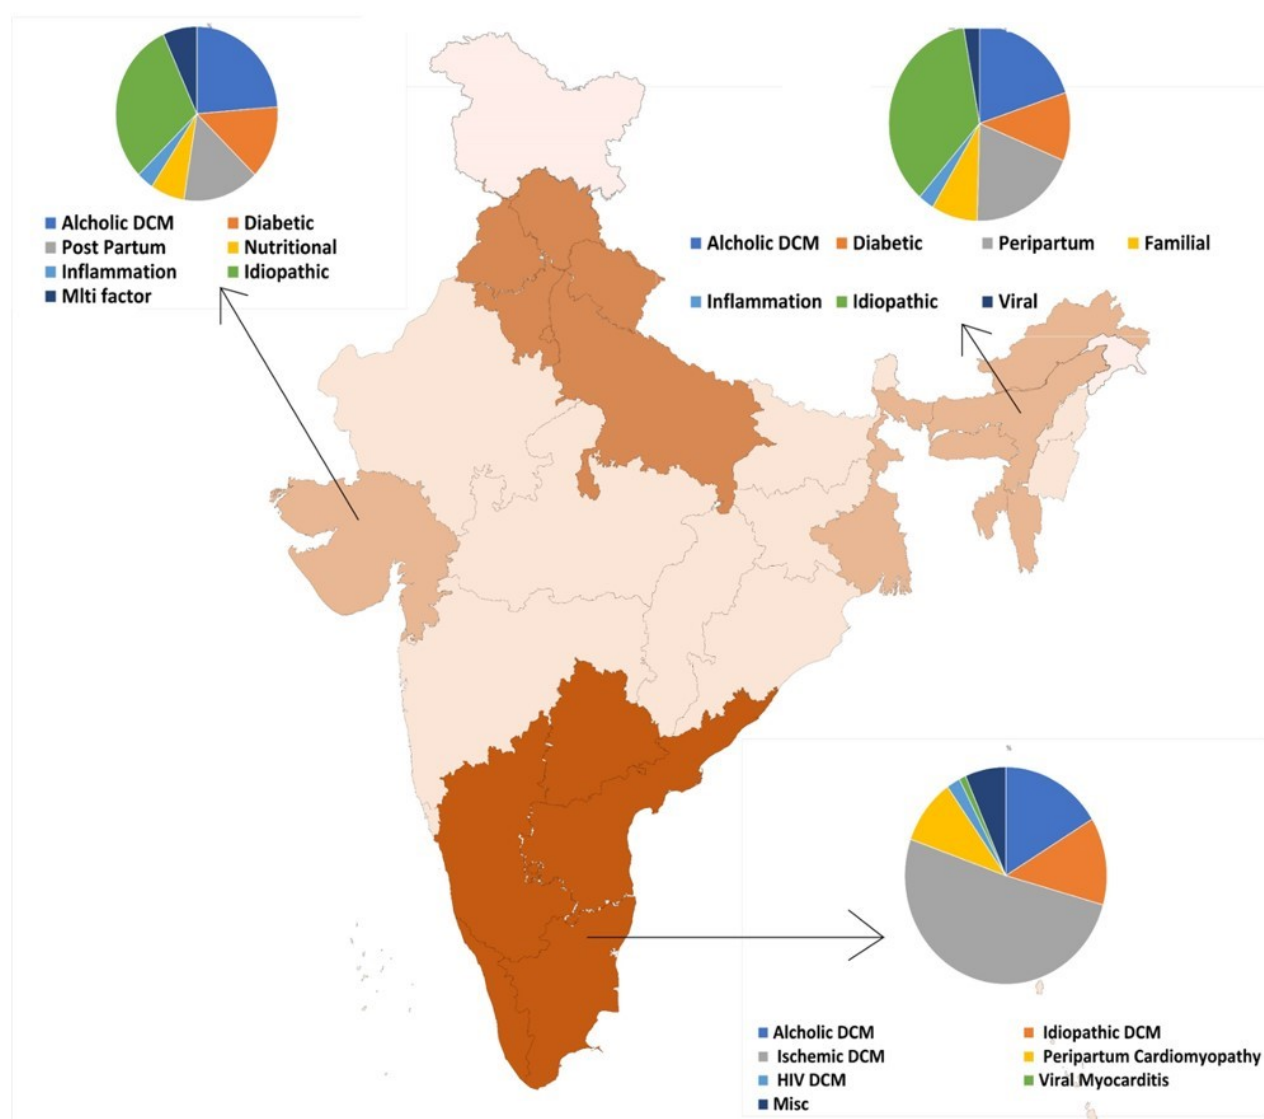

**Figure S1.** Representative map of India highlighting different studies performed on DCM across the country.
